# Supplementary material for: Hepatocellular Carcinoma in Metabolic Dysfunction-Associated Steatotic Liver Disease
Source: PubMed Central journal article supplement (PMC11240192; doi:10.1001/jamanetworkopen.2024.21019), 2024-07-11
Supplement: jamanetwopen-e2421019-s001.pdf [file jamanetwopen-e2421019-s001.pdf]

## Supplemental Online Content

Rodriguez LA, Schmittiel JA, Liu L, et al. Hepatocellular carcinoma in metabolic dysfunction-associated steatotic liver disease. *JAMA Netw Open*. 2024;7(7):e2421019.  
doi:10.1001/jamanetworkopen.2024.21019

**eTable 1.** Identification of Prevalent Metabolic Dysfunction-Associated Steatotic Liver Disease

**eTable 2.** *ICD-9* and *ICD-10* Diagnosis Codes Used to Identify HCC and Comorbidities

**eFigure.** Cumulative Incidence Curves Showing the Cumulative Incidence of HCC in a Cohort of Patients With MASLD Followed Up From 2009 to September 30, 2021

This supplemental material has been provided by the authors to give readers additional information about their work.

**eTable 1.** Identification of Prevalent Metabolic Dysfunction-Associated Steatotic Liver Disease

| Data Sources                                                                                                                                                                                                                                                                                          | MASLD*                                                                                                                                                                                                                                                                                                                                                                                                                                                                                                                                                                                                                                                                                                                                                                                                                                                                                                                                                                             |
|-------------------------------------------------------------------------------------------------------------------------------------------------------------------------------------------------------------------------------------------------------------------------------------------------------|------------------------------------------------------------------------------------------------------------------------------------------------------------------------------------------------------------------------------------------------------------------------------------------------------------------------------------------------------------------------------------------------------------------------------------------------------------------------------------------------------------------------------------------------------------------------------------------------------------------------------------------------------------------------------------------------------------------------------------------------------------------------------------------------------------------------------------------------------------------------------------------------------------------------------------------------------------------------------------|
| <b>ICD-based</b> <ul style="list-style-type: none"> <li>• Outpatient encounter</li> <li>• Hospital discharge</li> <li>• Problem list</li> </ul>                                                                                                                                                       | ICD-9-CM diagnosis codes: 571.9 (chronic liver disease NOS)<br>ICD-10-CM diagnosis codes: K76.0 (fatty [change of] liver, NEC), K73.8 (other hepatitis, NEC), K75.81 (Nonalcoholic steatohepatitis)                                                                                                                                                                                                                                                                                                                                                                                                                                                                                                                                                                                                                                                                                                                                                                                |
| <b>Imaging-based</b><br>Imaging studies of interest based on CPT-4 codes: <ul style="list-style-type: none"> <li>• Ultrasound: 76700, 76705</li> <li>• Computerized tomography: 74150, 74160, 74170, 74175, 74176, 74177, 74178</li> <li>• Magnetic resonance imaging: 74181, 74182, 74183</li> </ul> | Using SAS regular expression to search for terms of interest in “Impression Section” in members with completed imaging studies: <ul style="list-style-type: none"> <li>• Fatty liver</li> <li>• Hepatic steatosis</li> <li>• Increased liver echogenicity</li> </ul> Terms negating MASLD of interest: <ul style="list-style-type: none"> <li>• Hepatitis C</li> <li>• Autoimmune hepatitis</li> <li>• Primary biliary cirrhosis</li> </ul>                                                                                                                                                                                                                                                                                                                                                                                                                                                                                                                                        |
| <b>Dallas Steatosis Index-based</b> <ul style="list-style-type: none"> <li>• Completed laboratory tests: Triglyceride, Alanine aminotransferase (ALT)</li> <li>• Body mass index</li> </ul>                                                                                                           | Dallas Steatosis Index (DSI) calculated as:<br>$-9.4 + 0.316$ (if $\geq 50$ years-of-age and female) + 2.4 (if known diabetes) + 0.02 (equals 0 if diabetic; if not diabetic equals glucose concentration in mg/dL) + 0.3 (if known hypertension) + 0.5 (if Hispanic/Asian/Other Race/Ethnicity) + Ln (triglycerides in mg/dL) + 0.4 (if ALT 13.5–19.49 IU/L) + 1.1 (if ALT 19.5–40 IU/L) + 1.5 (if ALT >40 IU/L) + 0.7 (if not black and BMI 25–27.49 kg/m <sup>2</sup> ) + 1.4 (if not black and BMI 27.5–34.9 kg/m <sup>2</sup> ) + 1.9 (if not black and BMI 35–37.49 kg/m <sup>2</sup> ) + 2.6 (if not black and BMI >37.5 kg/m <sup>2</sup> ) - 0.2 (if black and BMI 25–27.49 kg/m <sup>2</sup> ) + 0.9 (if black and BMI 27.5–34.9 kg/m <sup>2</sup> ) + 0.8 (if black and BMI 35–37.49 kg/m <sup>2</sup> ) + 1.8 (if black and BMI >37.5 kg/m <sup>2</sup> )<br>Source: <a href="https://doi.org/10.1016/j.cgh.2020.01.020">https://doi.org/10.1016/j.cgh.2020.01.020</a> |

Abbreviations: ALT, alanine transaminase; BMI, body mass index; CPT, current procedural terminology; ICD, International Classification of Diseases; MASLD, metabolic dysfunction-associated steatotic liver disease; NEC, not elsewhere classified; NOS, not otherwise specified.

\* Excluding hepatitis C (ICD-9-CM: 070.41, 070.44, 070.51, 070.54, 070.70, 070.71, V02.62; ICD-10-CM: B17.10, B18.2, Z86.19); autoimmune hepatitis (ICD-9-CM: 571.42 ICD-10-CM: K75.4); primary biliary cirrhosis (ICD-9-CM: 571.6 ICD-10-CM: K74.5); acute alcoholic hepatitis (ICD-9: 571.1; ICD-10: K70.10, K70.11); alcoholic fatty liver (ICD-9: 571.0; ICD-10: K70.0); unspecified alcoholic liver damage (ICD-9: 571.3; ICD-10: K70.40, K70.41, K70.9); alcoholic cirrhosis (ICD-9: 571.2; ICD-10: K70.2, K70.30, K70.31); alcohol use disorder (ICD-9: 305.00–305.03; ICD-10: F10.1x); and chemical dependency treatment (ICD-9: 304.61-6, 304.70-72, 304.80-82, 304.90-92; ICD-10: F19.20).

**eTable 2.** ICD-9 and ICD-10 Diagnosis Codes Used to Identify HCC and Comorbidities

| Condition | ICD-9/10 code(s) used and definition(s)                                                                                                                                                                                                                                                                                                                                                                                                                                                                                                                                                                                                                                                                                                                                                                                                                                                                                                                                                                                                                                                                                                                                                                                                                                                                                                                                                                                                                                                                                                                                                                                                                                                                                                                                                                                                                                                                                                                                                                                                                                                                                                                                                                                                                                                                                                                                                                                                                                                                                                                                                                                                                                                                                                                                                                                                                                                                        |
|-----------|----------------------------------------------------------------------------------------------------------------------------------------------------------------------------------------------------------------------------------------------------------------------------------------------------------------------------------------------------------------------------------------------------------------------------------------------------------------------------------------------------------------------------------------------------------------------------------------------------------------------------------------------------------------------------------------------------------------------------------------------------------------------------------------------------------------------------------------------------------------------------------------------------------------------------------------------------------------------------------------------------------------------------------------------------------------------------------------------------------------------------------------------------------------------------------------------------------------------------------------------------------------------------------------------------------------------------------------------------------------------------------------------------------------------------------------------------------------------------------------------------------------------------------------------------------------------------------------------------------------------------------------------------------------------------------------------------------------------------------------------------------------------------------------------------------------------------------------------------------------------------------------------------------------------------------------------------------------------------------------------------------------------------------------------------------------------------------------------------------------------------------------------------------------------------------------------------------------------------------------------------------------------------------------------------------------------------------------------------------------------------------------------------------------------------------------------------------------------------------------------------------------------------------------------------------------------------------------------------------------------------------------------------------------------------------------------------------------------------------------------------------------------------------------------------------------------------------------------------------------------------------------------------------------|
| Cirrhosis | ICD9/10 codes of 456.1, 456.21, 571.2, 571.5, I85.00, I98.2, K70.3, K71.7, K74.6, 572.2, 572.3, 572.4, 456.0, 456.20, 782.4, 789.5, I85.01, I86.4, I98.20, I98.3, K72.1, K72.9, K76.6, K76.7, R17, R18, or FIB4 score $\geq 3.25$                                                                                                                                                                                                                                                                                                                                                                                                                                                                                                                                                                                                                                                                                                                                                                                                                                                                                                                                                                                                                                                                                                                                                                                                                                                                                                                                                                                                                                                                                                                                                                                                                                                                                                                                                                                                                                                                                                                                                                                                                                                                                                                                                                                                                                                                                                                                                                                                                                                                                                                                                                                                                                                                              |
| Drug use  | 292, 292.0, 292.1, 292.11, 292.12, 292.2, 292.8, 292.81, 292.82, 292.83, 292.84, 292.85, 292.89, 292.9, 304, 304.0, 304.00, 304.01, 304.02, 304.03, 304.1, 304.10, 304.11, 304.12, 304.13, 304.2, 304.20, 304.21, 304.22, 304.23, 304.3, 304.30, 304.31, 304.32, 304.33, 304.4, 304.40, 304.41, 304.42, 304.43, 304.5, 304.50, 304.51, 304.52, 304.53, 304.6, 304.60, 304.61, 304.62, 304.63, 304.7, 304.70, 304.71, 304.72, 304.73, 304.8, 304.80, 304.81, 304.82, 304.83, 304.9, 304.90, 304.91, 304.92, 304.93, 305.2, 305.20, 305.21, 305.22, 305.23, 305.3, 305.30, 305.31, 305.32, 305.33, 305.4, 305.40, 305.41, 305.42, 305.43, 305.5, 305.50, 305.51, 305.52, 305.53, 305.6, 305.60, 305.61, 305.62, 305.63, 305.7, 305.70, 305.71, 305.72, 305.73, 305.8, 305.80, 305.81, 305.82, 305.83, 305.9, 305.90, 305.91, 305.92, 305.93, F11, F11.1, F11.10, F11.11, F11.12, F11.120, F11.121, F11.122, F11.129, F11.14, F11.15, F11.150, F11.151, F11.159, F11.18, F11.181, F11.182, F11.188, F11.19, F11.2, F11.20, F11.21, F11.22, F11.220, F11.221, F11.222, F11.229, F11.23, F11.24, F11.25, F11.250, F11.251, F11.259, F11.28, F11.281, F11.282, F11.288, F11.29, F11.9, F11.90, F11.92, F11.920, F11.921, F11.922, F11.929, F11.93, F11.94, F11.95, F11.950, F11.951, F11.959, F11.98, F11.981, F11.982, F11.988, F11.99, F12, F12.1, F12.10, F12.11, F12.12, F12.120, F12.121, F12.122, F12.129, F12.15, F12.150, F12.151, F12.159, F12.18, F12.180, F12.188, F12.19, F12.2, F12.20, F12.21, F12.220, F12.221, F12.222, F12.229, F12.23, F12.25, F12.250, F12.251, F12.259, F12.28, F12.280, F12.288, F12.29, F12.9, F12.90, F12.92, F12.920, F12.921, F12.922, F12.929, F12.93, F12.95, F12.950, F12.951, F12.959, F12.98, F12.980, F12.988, F12.99, F13, F13.1, F13.10, F13.11, F13.12, F13.120, F13.121, F13.129, F13.14, F13.15, F13.150, F13.151, F13.159, F13.18, F13.180, F13.181, F13.182, F13.188, F13.19, F13.2, F13.20, F13.21, F13.22, F13.220, F13.221, F13.229, F13.23, F13.230, F13.231, F13.232, F13.239, F13.24, F13.25, F13.250, F13.251, F13.259, F13.26, F13.27, F13.28, F13.280, F13.281, F13.282, F13.288, F13.29, F13.9, F13.90, F13.92, F13.920, F13.921, F13.929, F13.93, F13.930, F13.931, F13.932, F13.939, F13.94, F13.95, F13.950, F13.951, F13.959, F13.96, F13.97, F13.98, F13.980, F13.981, F13.982, F13.988, F13.99, F14, F14.1, F14.10, F14.11, F14.12, F14.120, F14.121, F14.122, F14.129, F14.14, F14.15, F14.150, F14.151, F14.159, F14.18, F14.180, F14.181, F14.182, F14.188, F14.19, F14.2, F14.20, F14.21, F14.22, F14.220, F14.221, F14.222, F14.229, F14.23, F14.24, F14.25, F14.250, F14.251, F14.259, F14.28, F14.280, F14.281, F14.282, F14.288, F14.29, F14.9, F14.90, F14.92, F14.920, F14.921, F14.922, F14.929, F14.94, F14.95, F14.950, F14.951, F14.959, F14.98, F14.980, F14.981, F14.982, F14.988, F14.99, F15, F15.1, F15.10, F15.11, F15.12, |

|                                                                  |                                                                                                                                                                                                                                                                                                                                                                                                                                                                                                                                                                                                                                                                                                                                                                                                                                                                                                                                                                                                                                                                                                                                                                                                                                                                                                                                                                                                                                                                                                                                                                                                                                                                                                                                                                                                                                                                                                                                                                                                                 |
|------------------------------------------------------------------|-----------------------------------------------------------------------------------------------------------------------------------------------------------------------------------------------------------------------------------------------------------------------------------------------------------------------------------------------------------------------------------------------------------------------------------------------------------------------------------------------------------------------------------------------------------------------------------------------------------------------------------------------------------------------------------------------------------------------------------------------------------------------------------------------------------------------------------------------------------------------------------------------------------------------------------------------------------------------------------------------------------------------------------------------------------------------------------------------------------------------------------------------------------------------------------------------------------------------------------------------------------------------------------------------------------------------------------------------------------------------------------------------------------------------------------------------------------------------------------------------------------------------------------------------------------------------------------------------------------------------------------------------------------------------------------------------------------------------------------------------------------------------------------------------------------------------------------------------------------------------------------------------------------------------------------------------------------------------------------------------------------------|
|                                                                  | F15.120, F15.121, F15.122, F15.129, F15.14, F15.15, F15.150, F15.151, F15.159, F15.18, F15.180, F15.181, F15.182, F15.188, F15.19, F15.2, F15.20, F15.21, F15.22, F15.220, F15.221, F15.222, F15.229, F15.23, F15.24, F15.25, F15.250, F15.251, F15.259, F15.28, F15.280, F15.281, F15.282, F15.288, F15.29, F15.9, F15.90, F15.92, F15.920, F15.921, F15.922, F15.929, F15.93, F15.94, F15.95, F15.950, F15.951, F15.959, F15.98, F15.980, F15.981, F15.982, F15.988, F15.99, F16, F16.1, F16.10, F16.11, F16.12, F16.120, F16.121, F16.122, F16.129, F16.14, F16.15, F16.150, F16.151, F16.159, F16.18, F16.180, F16.183, F16.188, F16.19, F16.2, F16.20, F16.21, F16.22, F16.220, F16.221, F16.229, F16.24, F16.25, F16.250, F16.251, F16.259, F16.28, F16.280, F16.283, F16.288, F16.29, F16.9, F16.90, F16.92, F16.920, F16.921, F16.929, F16.94, F16.95, F16.950, F16.951, F16.959, F16.98, F16.980, F16.983, F16.988, F16.99, F18, F18.1, F18.10, F18.11, F18.12, F18.120, F18.129, F18.14, F18.15, F18.150, F18.151, F18.159, F18.17, F18.18, F18.180, F18.188, F18.19, F18.2, F18.20, F18.21, F18.22, F18.220, F18.221, F18.229, F18.24, F18.25, F18.250, F18.251, F18.259, F18.27, F18.28, F18.280, F18.288, F18.29, F18.9, F18.90, F18.92, F18.920, F18.921, F18.929, F18.94, F18.95, F18.950, F18.951, F18.959, F18.97, F18.98, F18.980, F18.988, F18.99, F19, F19.1, F19.10, F19.11, F19.12, F19.120, F19.121, F19.122, F19.129, F19.14, F19.15, F19.150, F19.151, F19.159, F19.16, F19.17, F19.18, F19.180, F19.181, F19.182, F19.188, F19.19, F19.2, F19.20, F19.21, F19.22, F19.220, F19.221, F19.222, F19.229, F19.23, F19.230, F19.231, F19.232, F19.239, F19.24, F19.25, F19.250, F19.251, F19.259, F19.26, F19.27, F19.28, F19.280, F19.281, F19.282, F19.288, F19.29, F19.9, F19.90, F19.92, F19.920, F19.921, F19.922, F19.929, F19.93, F19.930, F19.931, F19.932, F19.939, F19.94, F19.95, F19.950, F19.951, F19.959, F19.96, F19.97, F19.98, F19.980, F19.981, F19.982, F19.988, F19.99 |
| Hepatocellular carcinoma (HCC)                                   | KPNC Tumor Registry                                                                                                                                                                                                                                                                                                                                                                                                                                                                                                                                                                                                                                                                                                                                                                                                                                                                                                                                                                                                                                                                                                                                                                                                                                                                                                                                                                                                                                                                                                                                                                                                                                                                                                                                                                                                                                                                                                                                                                                             |
| Human immunodeficiency virus (HIV)                               | ICD-9 042 to 044.999 inclusive, or ICD-10 B20 to B20.999 inclusive                                                                                                                                                                                                                                                                                                                                                                                                                                                                                                                                                                                                                                                                                                                                                                                                                                                                                                                                                                                                                                                                                                                                                                                                                                                                                                                                                                                                                                                                                                                                                                                                                                                                                                                                                                                                                                                                                                                                              |
| Metabolic dysfunction-associated steatotic liver disease (MASLD) | ICD-9-CM diagnosis codes: 571.9 (chronic liver disease NOS)<br>ICD-10-CM diagnosis codes: K76.0 (fatty [change of] liver, NEC), K73.8 (other hepatitis, NEC), K75.81 (Nonalcoholic steatohepatitis)                                                                                                                                                                                                                                                                                                                                                                                                                                                                                                                                                                                                                                                                                                                                                                                                                                                                                                                                                                                                                                                                                                                                                                                                                                                                                                                                                                                                                                                                                                                                                                                                                                                                                                                                                                                                             |
| Other immune disease                                             | 275.1, E83.01, 275.01, 275.03, E83.110, 273.4, E88.01, 571.5, K74.69                                                                                                                                                                                                                                                                                                                                                                                                                                                                                                                                                                                                                                                                                                                                                                                                                                                                                                                                                                                                                                                                                                                                                                                                                                                                                                                                                                                                                                                                                                                                                                                                                                                                                                                                                                                                                                                                                                                                            |
| Steatohepatitis                                                  | 571.1, 571.2, 571.8, K70.10, K70.11, K70.2, K70.30, K70.31, K75.81                                                                                                                                                                                                                                                                                                                                                                                                                                                                                                                                                                                                                                                                                                                                                                                                                                                                                                                                                                                                                                                                                                                                                                                                                                                                                                                                                                                                                                                                                                                                                                                                                                                                                                                                                                                                                                                                                                                                              |

Abbreviations: HCC, hepatocellular carcinoma; HIV, human immunodeficiency virus; ICD, International Classification of Diseases; INR, international normalized ratio; KPNC, Kaiser Permanente Northern California; MASLD, metabolic dysfunction-associated steatotic liver disease; NEC, not elsewhere classified; NOS, not otherwise specified.

**eFigure.** Cumulative Incidence Curves Showing the Cumulative Incidence of HCC in a Cohort of Patients With MASLD Followed-Up From 2009 to September 30, 2021 Plotted by low-, medium- and high-risk intervals of HCC risk. HCC, hepatocellular carcinoma; MASLD, metabolic dysfunction-associated steatotic liver disease.

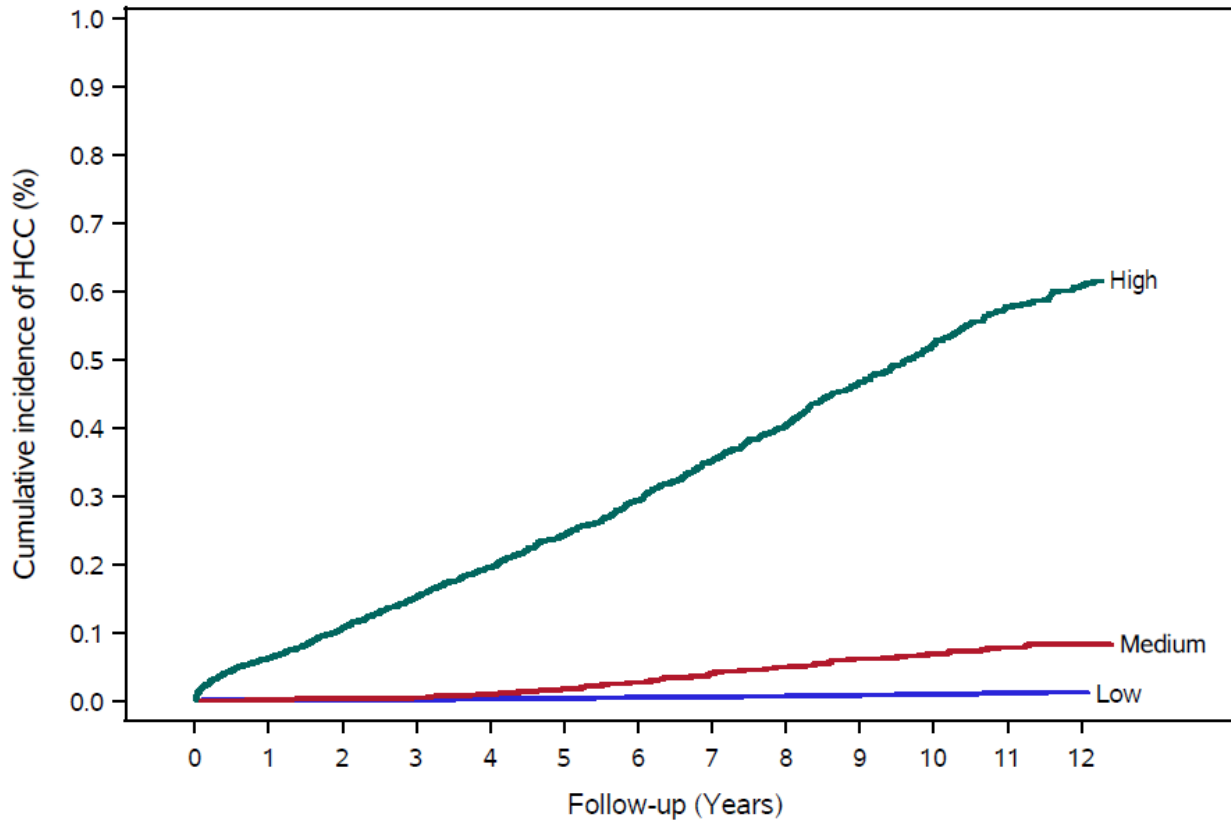

| N° at risk |                                                                      |
|------------|----------------------------------------------------------------------|
| High       | 178,930    159,250    131,660    103,778    77,539    48,909         |
| Medium     | 157,472    146,609    124,772    99,716    75,013    45,808          |
| Low        | 1,475,059    1,427,067    1,217,530    933,040    659,332    330,536 |
