# Supplementary material for: Hepatocellular Carcinoma in Metabolic Dysfunction-Associated Steatotic Liver Disease
Source: PubMed Central journal article supplement (PMC11240192; doi:10.1001/jamanetworkopen.2024.21019), 2024-07-11
Supplement: jamanetwopen-e2421019-s002.pdf [file jamanetwopen-e2421019-s002.pdf]

## Data Sharing Statement

Rodriguez. Hepatocellular Carcinoma in Metabolic Dysfunction-Associated Steatotic Liver Disease. *JAMA Netw Open*. Published July 11, 2024.  
doi:10.1001/jamanetworkopen.2024.21019

### Data

**Data available:** No
